# Supplementary material for: The effects of a physical and cognitive training intervention vs. physical training alone on older adults’ physical activity: A randomized controlled trial with extended follow-up during COVID-19
Source: PubMed Central journal article supplement (PMC8513828; doi:10.1371/journal.pone.0258559), 2021-10-13
Supplement: pone.0258559.s003.pdf [file pone.0258559.s003.pdf]

**S3 Table. The joint effects of executive functions on physical activity in pooled data.**

|                        | $\chi^2$ | p-value |
|------------------------|----------|---------|
| EF <sub>0</sub>        |          |         |
| PA <sub>0</sub>        | 0.89     | 0.828   |
| PA <sub>6</sub>        | 9.46     | 0.024   |
| PA <sub>12</sub>       | 7.34     | 0.062   |
| PA <sub>FU</sub>       | 8.56     | 0.036   |
| PA <sub>COVID-19</sub> | 7.49     | 0.058   |
| EF <sub>6-0</sub>      |          |         |
| PA <sub>6</sub>        | 2.08     | 0.557   |
| PA <sub>12</sub>       | 2.87     | 0.412   |
| PA <sub>FU</sub>       | 4.28     | 0.233   |
| PA <sub>COVID-19</sub> | 1.25     | 0.740   |
| EF <sub>12-0</sub>     |          |         |
| PA <sub>12</sub>       | 1.41     | 0.704   |
| PA <sub>FU</sub>       | 1.74     | 0.629   |
| PA <sub>COVID-19</sub> | 0.23     | 0.973   |

Note.

$\chi^2$  = Wald chi-square test statistic

PA<sub>0</sub>: Physical activity at baseline

PA<sub>6</sub>: Physical activity at six months of the interventions

PA<sub>12</sub>: Physical activity at twelve months of the interventions

PA<sub>FU</sub>: Physical activity at one-year follow up

PA<sub>COVID-19</sub>: Physical activity during COVID-19 restrictions

EF<sub>0</sub>: Performance in the executive functioning tests at baseline

EF<sub>6-0</sub>: Change in performance in the executive functioning tests from baseline to six months

EF<sub>12-0</sub>: Change in performance in the executive functioning tests from baseline to twelve months
